# Supplementary material for: LncRNA MALAT1 gene polymorphisms in coronary artery disease: a case–control study in a Chinese population
Source: Oxford University Press journal article supplement (doi:10.1042/bsr20182213), 2019-03-01
Supplement: bsr-2018-2213_supp.pdf [file bsr-2018-2213_supp.pdf]

**lncRNA MALAT1 gene polymorphisms in coronary artery disease: a  
case-control study in a Chinese population**

Weina Hu<sup>1</sup>, Hanxi Ding<sup>2</sup>, An Ouyang<sup>3</sup>, Xiaohong Zhang<sup>1</sup>, Qian Xu<sup>2</sup>, Yunan Han<sup>4</sup>,  
Xueying Zhang<sup>1</sup>, Yuanzhe Jin<sup>1,\*</sup>

<sup>1</sup>The Department of Cardiology, the Fourth Affiliated Hospital of China Medical University, Shenyang 110034, China

<sup>2</sup>The First Affiliated Hospital of China Medical University, and Key Laboratory of Cancer Etiology and Prevention (China Medical University), Liaoning Provincial Education Department, Shenyang 110001, China

<sup>3</sup>Department of Kinesiology and Health Promotion, University of Kentucky, Lexington, KY, U.S

<sup>4</sup>Division of Public Health Sciences, Department of Surgery, Washington University School of Medicine, St Louis, MO, 63110, U.S

**\*Corresponding author:**

Dr. Yuan-zhe Jin, MD/PhD, Professor

Vice-dean of the Fourth Affiliated Hospital of China Medical University

Director of the Department of Cardiology the Fourth Affiliated Hospital of China Medical University

4#East Chongshan Road,Huanggu District,Shenyang,Liaoning, Province, China.

Zip code: 110032

Tel: +86-18900916111

fax: +86-24-62042989

E-mail address: yzjin@cmu.edu.cn

Supplementary Table 1 The baseline of the subjects

| Variables                |              | CON vs.CAS   |              |                          |
|--------------------------|--------------|--------------|--------------|--------------------------|
|                          |              | CON(%)       | CAD(%)       | <i>P</i> values          |
|                          |              | <b>n=384</b> | <b>n=365</b> |                          |
| Gender                   |              |              |              | <i>P</i> =0.546          |
|                          | Male         | 283(73.7)    | 276(75.6)    |                          |
|                          | Female       | 101(26.3)    | 89(24.4)     |                          |
| Age                      |              |              |              | <i>P</i> =0.986          |
|                          | Mean±SD      | 57.0±8.1     | 57.4±8.8     |                          |
|                          | Median       | 28/Feb/00    | 28/Feb/00    |                          |
|                          | Range        | 35-79        | 29-81        |                          |
| Smoking                  |              |              |              | <b><i>P</i>&lt;0.001</b> |
|                          | Ever Smoker  | 198(51.6)    | 249(68.2)    |                          |
|                          | Never Smoker | 186(48.4)    | 116(31.8)    |                          |
| Drinking                 |              |              |              | <b><i>P</i>&lt;0.001</b> |
|                          | Drinker      | 218(56.8)    | 97(26.6)     |                          |
|                          | Nondrinker   | 166(43.2)    | 268(73.4)    |                          |
| HBP                      |              |              |              | <b><i>P</i>&lt;0.001</b> |
|                          | Had          | 115(29.9)    | 209(57.4)    |                          |
|                          | No           | 269(70.1)    | 155(42.6)    |                          |
| Diabetes                 |              |              |              | <b><i>P</i>&lt;0.001</b> |
|                          | Had          | 48(12.5)     | 96(26.3)     |                          |
|                          | No           | 335(87.5)    | 269(73.7)    |                          |
| Cerebrovascular Disease  |              |              |              | <b><i>P</i>&lt;0.001</b> |
|                          | Had          | 17(4.4)      | 50(13.7)     |                          |
|                          | No           | 367(95.6)    | 314(86.3)    |                          |
| Hyperlipidemia           |              |              |              | <b><i>P</i>&lt;0.001</b> |
|                          | Had          | 60(15.6)     | 196(53.7)    |                          |
|                          | No           | 324(84.4)    | 169(46.3)    |                          |
| Blood Glucose            |              |              |              | <b><i>P</i>&lt;0.001</b> |
|                          | High         | 106(27.8)    | 237(66.4)    |                          |
|                          | Normal       | 270(70.9)    | 117(32.8)    |                          |
|                          | Low          | 5(1.3)       | 3(0.8)       |                          |
| Total Cholesterol        |              |              |              | <b><i>P</i>&lt;0.001</b> |
|                          | High         | 192(50.0)    | 80(23.3)     |                          |
|                          | Normal       | 192(50.0)    | 263(76.7)    |                          |
| Triglyceride             |              |              |              | <i>P</i> =0.470          |
|                          | High         | 58(15.2)     | 59(17.2)     |                          |
|                          | Normal       | 323(84.8)    | 284(82.8)    |                          |
| High-density Lipoprotein |              |              |              | <b><i>P</i>&lt;0.001</b> |
|                          | High         | 12(3.1)      | 4(1.2)       |                          |
|                          | Normal       | 320(84.0)    | 164(47.8)    |                          |
|                          | Low          | 49(12.9)     | 175(51.0)    |                          |

Low-density Lipoprotein

***P*=0.021**

|        |           |           |
|--------|-----------|-----------|
| High   | 78(20.5)  | 64(18.7)  |
| Normal | 295(77.4) | 258(75.2) |
| Low    | 8(2.1)    | 21(6.1)   |

---

Note: CON:control; CAD:coronary artery disease. Smoking: smoking more than 1 cigarette per day and more than 6 months. Drinking: ethanol consumption in males (>140g/week), female (70g/week) and more than 1 year.
